# Supplementary material
Source: PubMed Central journal article supplement (PMC2973870)
Supplement: 1008501107_pnas.1008501107_SI.pdf [file 1008501107_pnas.1008501107_SI.pdf]

# Supporting Information

Bassani-Sternberg et al. 10.1073/pnas.1008501107

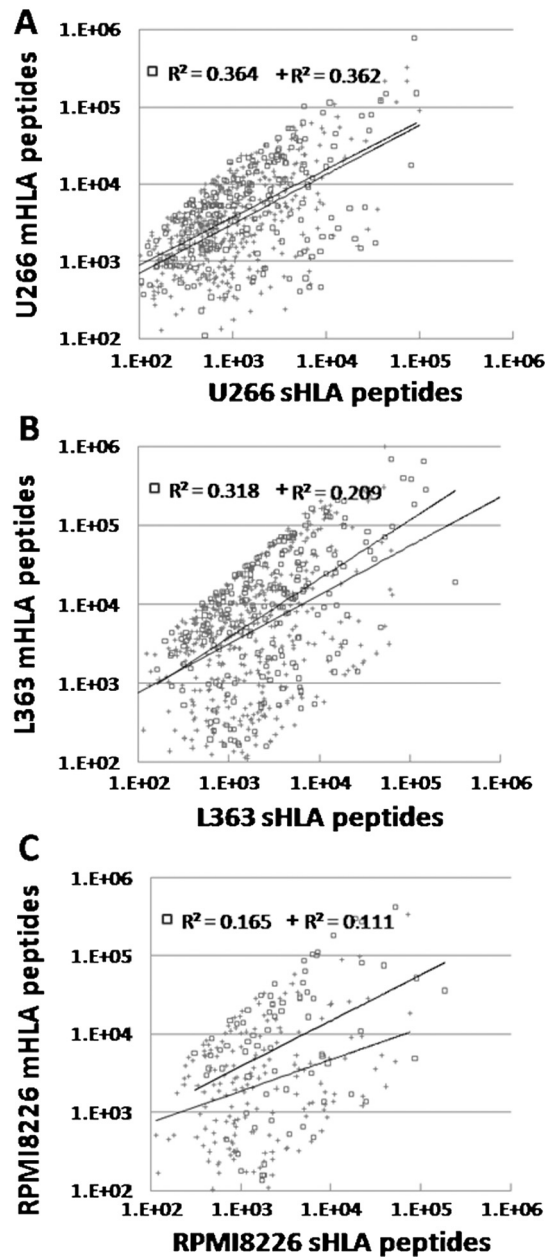

Fig. S1. Correlation of microcapillary chromatography  $\mu$ LC-MS signal intensities of soluble HLA peptides isolated from the growth medium and of membranous HLA peptides isolated from the multiple myeloma cell lines U266 (A), L363 (B), and RPMI8226 (C). High-score identified peptides with Pep-Miner score above 85 are indicated with  $\square$ ; intermediate-score peptides with Pep-Miner score of 70–85 are indicated with  $+$ .



**Table S5. Example of peptides originating from plasma proteins, identified among the immunoaffinity purified soluble HLA peptides collected from the donor's plasma**

[Table S5 \(DOC\)](#)

**Table S6. Similarities between the soluble HLA and membranal HLA peptidomes of cultured cell lines**

[Table S6 \(XLS\)](#)

**Table S7. The soluble HLA and membranal HLA peptidomes of three multiple myeloma cultured cell lines**

[Table S7 \(XLS\)](#)

**Table S8. Similarity between soluble HLA peptidomes identified in the plasma samples of different donors**

[Table S8 \(DOC\)](#)
